# Supplementary material
Source: HighWire-hosted journal article supplement (https://bibliotheek.ehb.be/content/76/1/85)

## Ethnic disparities in preventable hospital admissions in England

## Supplementary materials

**Table S1 ICD10 code list for ACSC conditions adopted from Bardsley et al. (2013)***Acute ACS conditions*

Cellulitis L03, L04, L08, L88, L980, L983  
 Dehydration E86  
 Dental conditions A690, K02-K06, K08, K098, K099, K12, K13  
 Ear, nose and throat infections H66, H67, J02, J03, J06, J312  
 Gangrene R02  
 Gastroenteritis K522, K528, K529  
 Nutritional deficiencies E40-E43, E55, E643  
 Pelvic inflammatory disease N70, N73, N74  
 Perforated/bleeding ulcer K250-K252, K254-K256, K260-K262, K264-K266, K270-K272, K274-K276, K280-K282, 284-K286  
 Urinary tract infection/Pyelonephritis N10, N11, N12, N136, N390

*Chronic ACS conditions*

Angina I20, I240, I248, I249  
 Asthma J45, J46  
 Chronic obstructive pulmonary disease J20, J41-J44, J47  
 Congestive heart failure I110, I50, J81  
 Convulsions and epilepsy G40, G41, O15, R56  
 Diabetes complications E100-E108, E110-E118, E120-E128, E130-E138, E140-E148  
 Hypertension I10, I119  
 Iron deficiency anaemia D501, D508, D509

*Vaccine preventable ACS conditions*

Influenza J10, J11  
 Pneumonia J13, J14, J153, J154, J157, J159, J168, J181, J188  
 Tuberculosis A15, A16, A19  
 Other vaccine preventable A35-A37, A80, B05, B06, B161, B169, B180, B181, B26, G000, M014

**Table S2 Age-, sex-, and deprivation adjusted odds ratios (OR 95% CI) for the combined ACSC outcome. Ethnicity group as recorded by NHS.**

| Ethnic group    | Age-sex adj. OR (95% CI) | p     | Age-sex-deprivation adj. OR (95% CI) | p     |
|-----------------|--------------------------|-------|--------------------------------------|-------|
| White British   | Ref                      | -     | Ref                                  | -     |
| Asian Other     | 1.04 (1.02-1.07)         | <.001 | 1.00 (0.98-1.03)                     | .777  |
| Bangladeshi     | 1.11 (1.08-1.15)         | <.001 | 0.97 (0.94-1.00)                     | .027  |
| Chinese         | 0.49 (0.47-0.52)         | <.001 | 0.47 (0.45-0.49)                     | <.001 |
| Indian          | 1.02 (1.00-1.04)         | .022  | 0.96 (0.94-0.98)                     | <.001 |
| Pakistani       | 1.70 (1.67-1.72)         | <.001 | 1.50 (1.47-1.52)                     | <.001 |
| Black African   | 0.91 (0.89-0.93)         | <.001 | 0.89 (0.87-0.92)                     | <.001 |
| Black Caribbean | 1.01 (0.98-1.03)         | .549  | 0.89 (0.87-0.92)                     | <.001 |
| Other           | 1.98 (1.95-2.01)         | <.001 | 1.81 (1.78-1.84)                     | <.001 |
| White Other     | 1.15 (1.14-1.17)         | <.001 | 1.12 (1.10-1.13)                     | <.001 |
| White Irish     | 0.71 (0.69-0.65)         | <.001 | 0.68 (0.66-0.70)                     | <.001 |
| Mixed           | 0.63 (0.62-0.65)         | <.001 | 0.60 (0.59-0.62)                     | <.001 |

**Figure S1 Incidence odds ratios (OR) of ACSC admission by ethnic group (as recorded by NHS) relative to White British adjusted for age, sex, and area deprivation. Top: Acute ACSC. Middle: Chronic ACSC. Bottom: Vaccine-preventable diseases. Open circles: risk adjusted for age group and sex. Filled circles: adjusted for age group, sex, and area deprivation.**

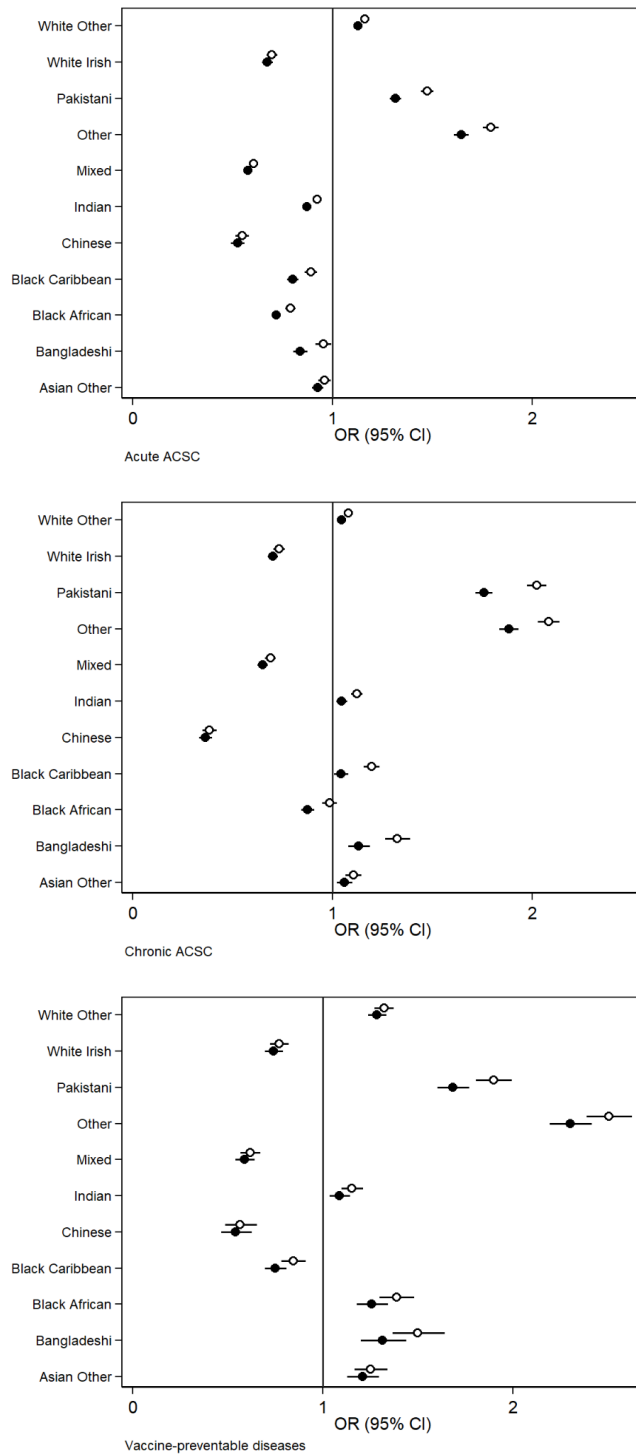

Supplement: inline-supplementary-material-1 [file inline-supplementary-material-1.pdf]
